# Supplementary material for: Upregulation of DWARF27 is associated with increased strigolactone levels under sulfur deficiency in rice
Source: PubMed Central journal article supplement (PMC6508544; doi:10.1002/pld3.50), 2018-04-11
Supplement: PLD3-2-e00050-s001.pdf [file PLD3-2-e00050-s001.pdf]

**Fig. S1**

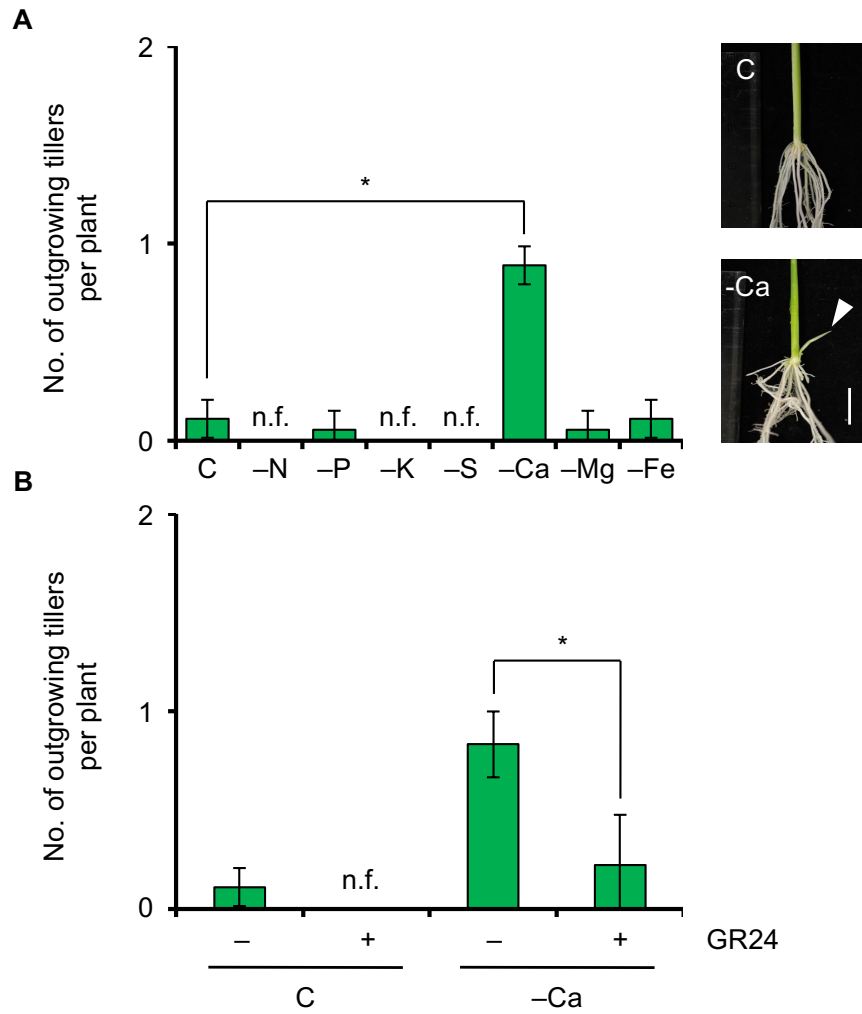

**Figure S1** Effect of nutrient deficiency in rice. Wild-type seedlings were grown in hydroponic culture media without the indicated macronutrients for one week. C, control. Outgrowing tillers (>2 mm) were counted in 2-week-old seedlings. **A.** Effect of nutrient deficiency on tiller bud outgrowth. An arrowhead indicates the outgrowth of the second leaf tiller. n.f., not found. Scale bar = 1 cm. **B.** Complementation by 1  $\mu$ M GR24. Data are means  $\pm$  S.E. ( $n = 3$ ). \*  $P < 0.05$  (Student's  $t$ -test).

**Fig. S2**

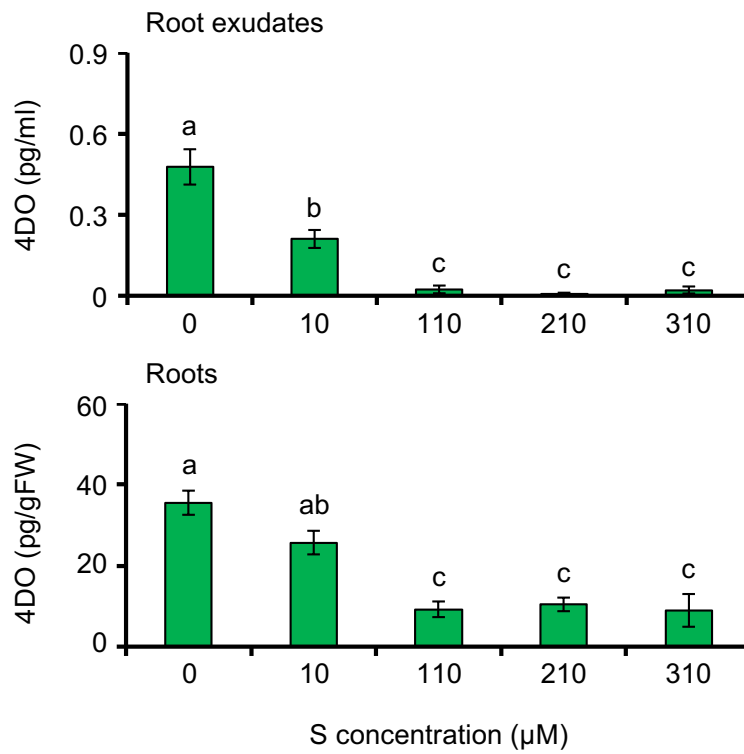

**Figure S2** The levels of 4DO in root exudates and roots in WT rice seedlings at various S concentrations. Samples were collected on day 7 after transfer to hydroponic media, and 4DO levels were analyzed using LC-MS/MS. Data are means  $\pm$  S.E. ( $n = 4$ ). Different letters indicate significant differences (Tukey's HSD,  $P < 0.05$ ).

**Fig. S3**

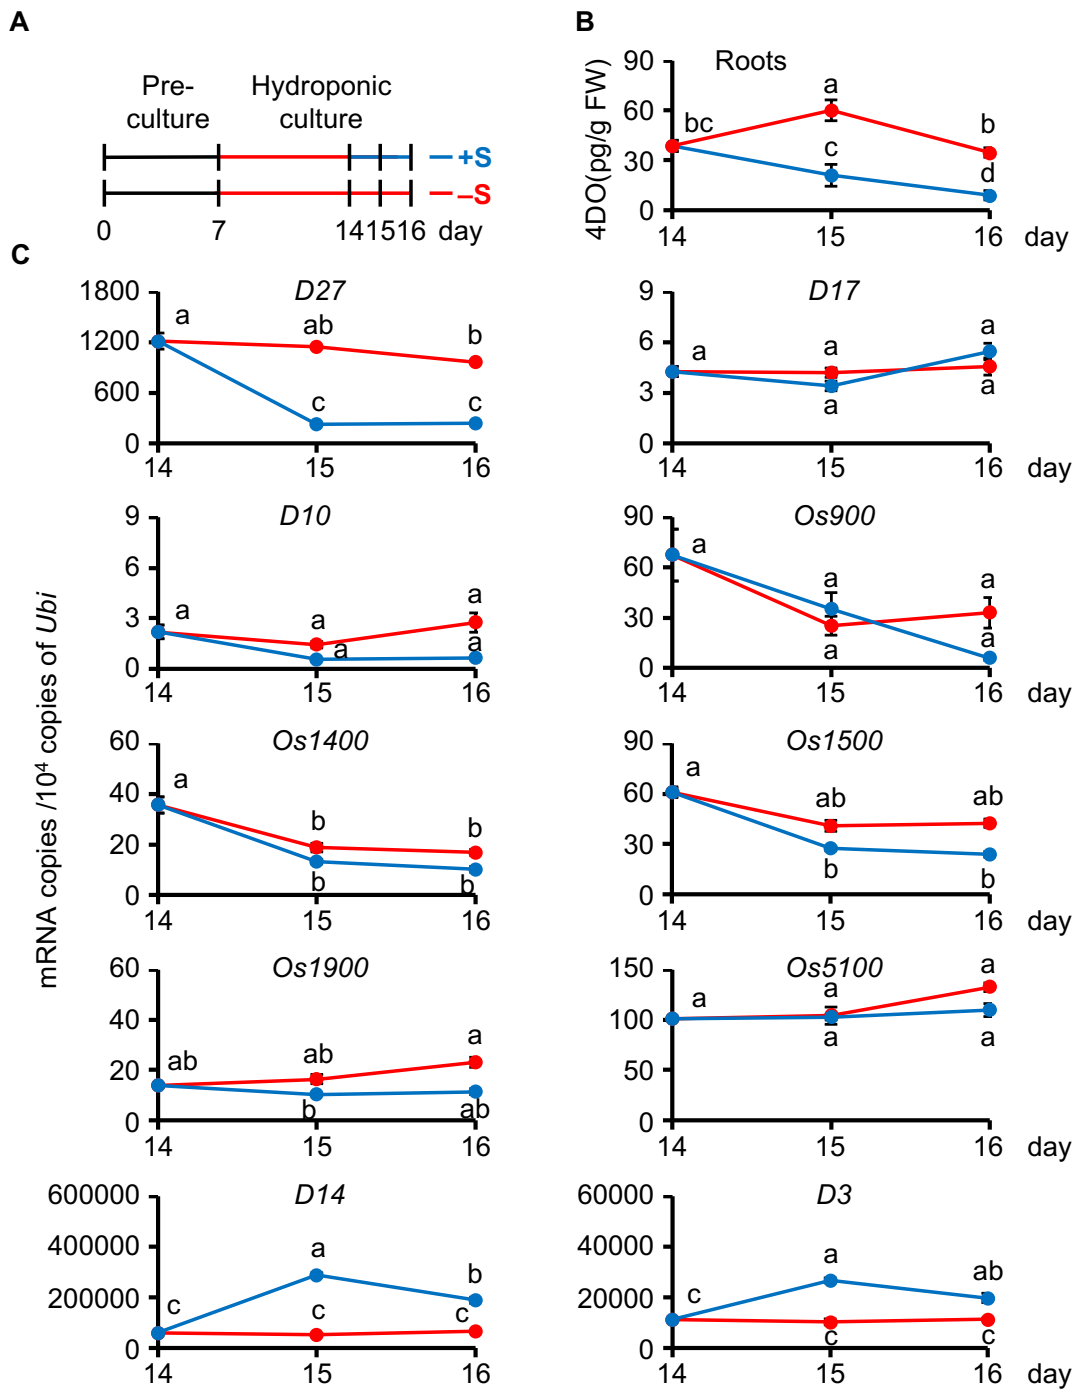

**Figure S3** Time-course analysis of 4DO levels and expression of SL-related genes in WT rice seedlings. **A.** Schematic diagram of experimental conditions. Blue and red lines indicate +S and -S conditions, respectively. Seedlings were transferred to fresh +S or -S medium on day 14, and 4DO levels and gene expression were analyzed on days 14, 15, and 16. **B.** 4DO levels in roots. Data are means  $\pm$  S.E. ( $n = 4$ ). **C.** Transcript levels of SL-related genes in roots. Data are means  $\pm$  S.E. ( $n = 3$ ). Different lowercase letters indicate significant differences (Tukey's HSD,  $P < 0.05$ ).

**Fig. S4**

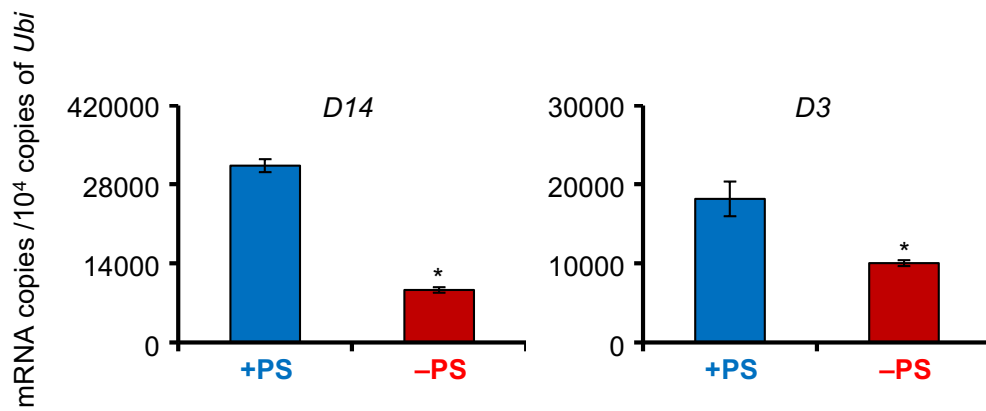

**Figure S4** Transcript levels of the SL-signaling genes *D3* and *D14* in roots under +S and -S conditions. Data are means  $\pm$  S.E. ( $n = 3$ ). The experimental procedure is shown in Fig. 6A. Expression was analyzed on day 15 of culture. \* $P < 0.05$  ( $t$ -test).

**Fig. S5**

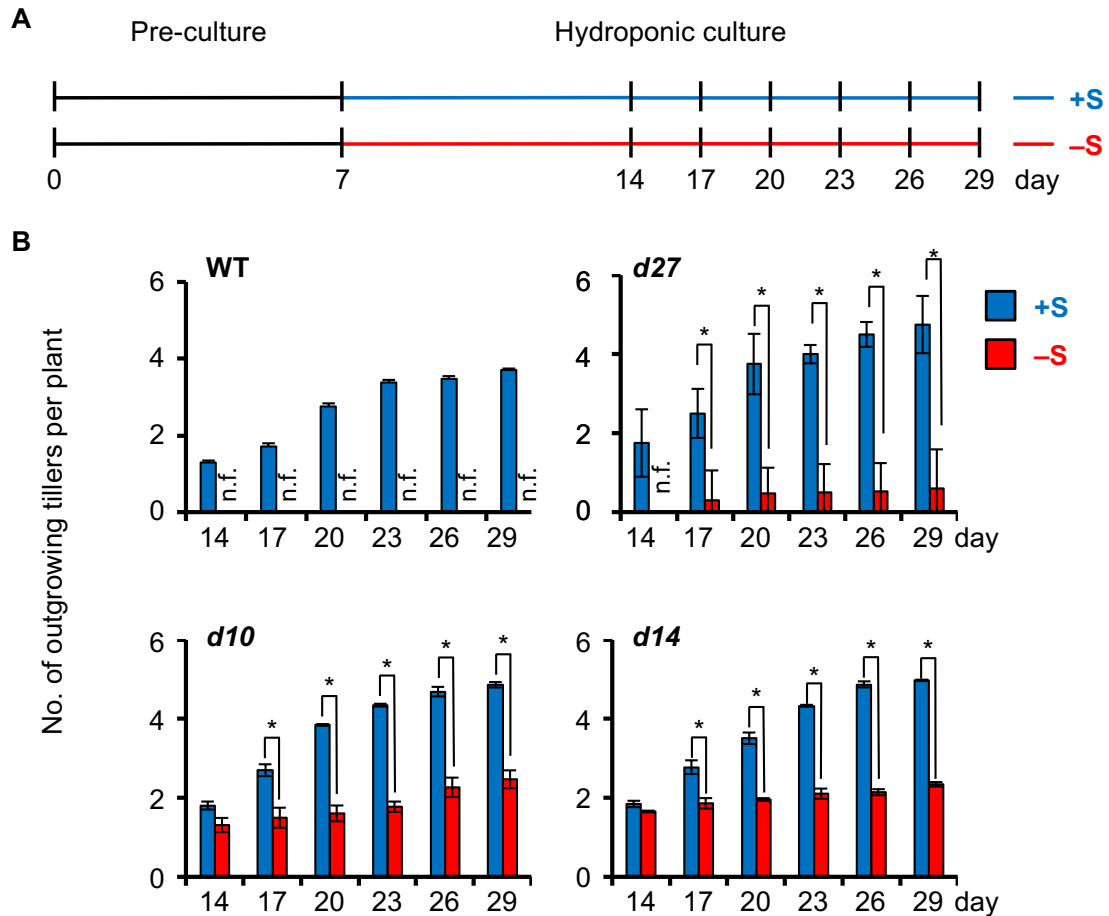

**Figure S5** Effect of S deficiency on chlorophyll content. **A.** Schematic diagram of experimental conditions. Black and gray bars indicate +S and -S conditions, respectively. **B.** SPAD values indicating chlorophyll contents in the third leaves. Data are means  $\pm$  S.E. ( $n = 3$ ). \*  $P < 0.01$  (Student  $t$ -test). **C.** Comparison of the SPAD values of WT and the *d27*, *d10*, and *d14* mutants. Data are means  $\pm$  S.E. ( $n = 3$ ). Significant differences between WT and, *d10*, *d14* and *d27* are shown as +, #,  $\times$  respectively (ANOVA,  $P < 0.05$ ).

Fig. S6

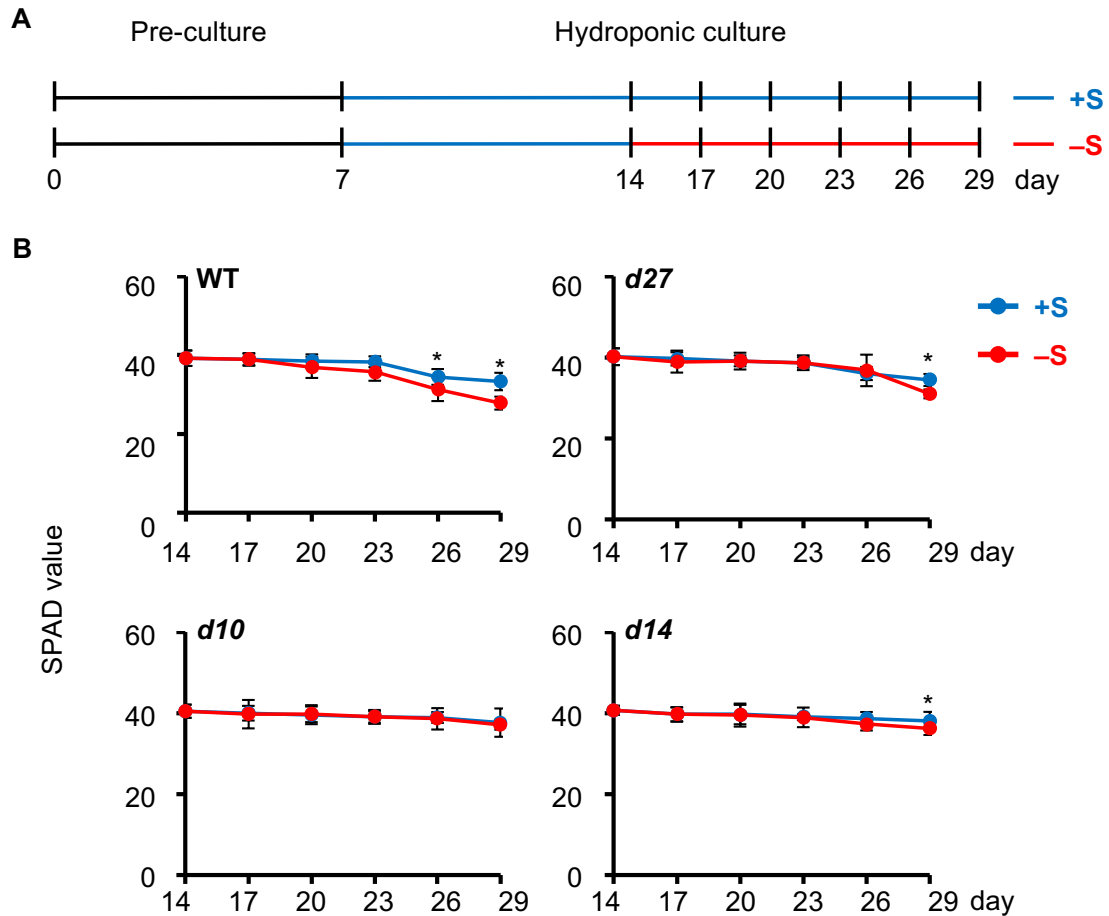

**Figure S6** Effect of S deficiency on chlorophyll content. **A.** Schematic diagram of experimental conditions. Black and gray bars indicate +S and -S conditions, respectively. **B.** SPAD values indicating chlorophyll contents in the third leaves. Data are means  $\pm$  S.E. ( $n = 3$ ). \*  $P < 0.01$  (Student  $t$ -test). **C.** Comparison of the SPAD values of WT and the *d27*, *d10*, and *d14* mutants. Data are means  $\pm$  S.E. ( $n = 3$ ). Significant differences between WT and, *d10*, *d14* and *d27* are shown as +, #,  $\times$  respectively (ANOVA,  $P < 0.05$ ).

**Fig. S7**

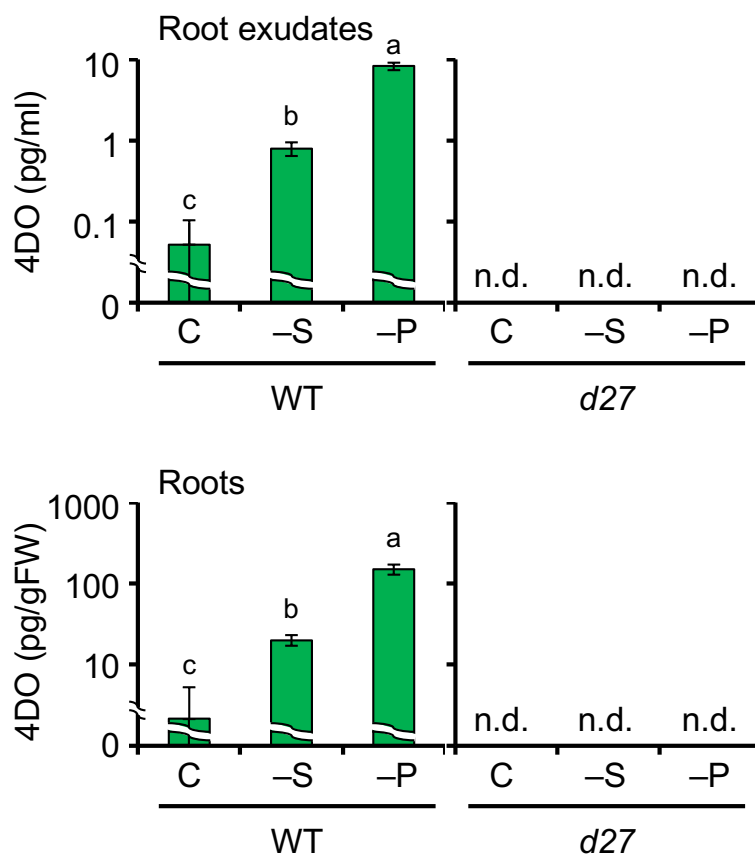

**Figure S7** The levels of 4DO in root exudates and roots of WT and *d27* seedlings. C, control. Samples were collected on day 7 after transfer to hydroponic culture medium (C, -S, or -P) and 4DO levels were analyzed using LC-MS/MS. n.d., not detected. Data are means  $\pm$  S.E. ( $n = 4$ ). Different letters indicate significant differences (Tukey's HSD,  $P < 0.05$ ).

**Fig. S8**

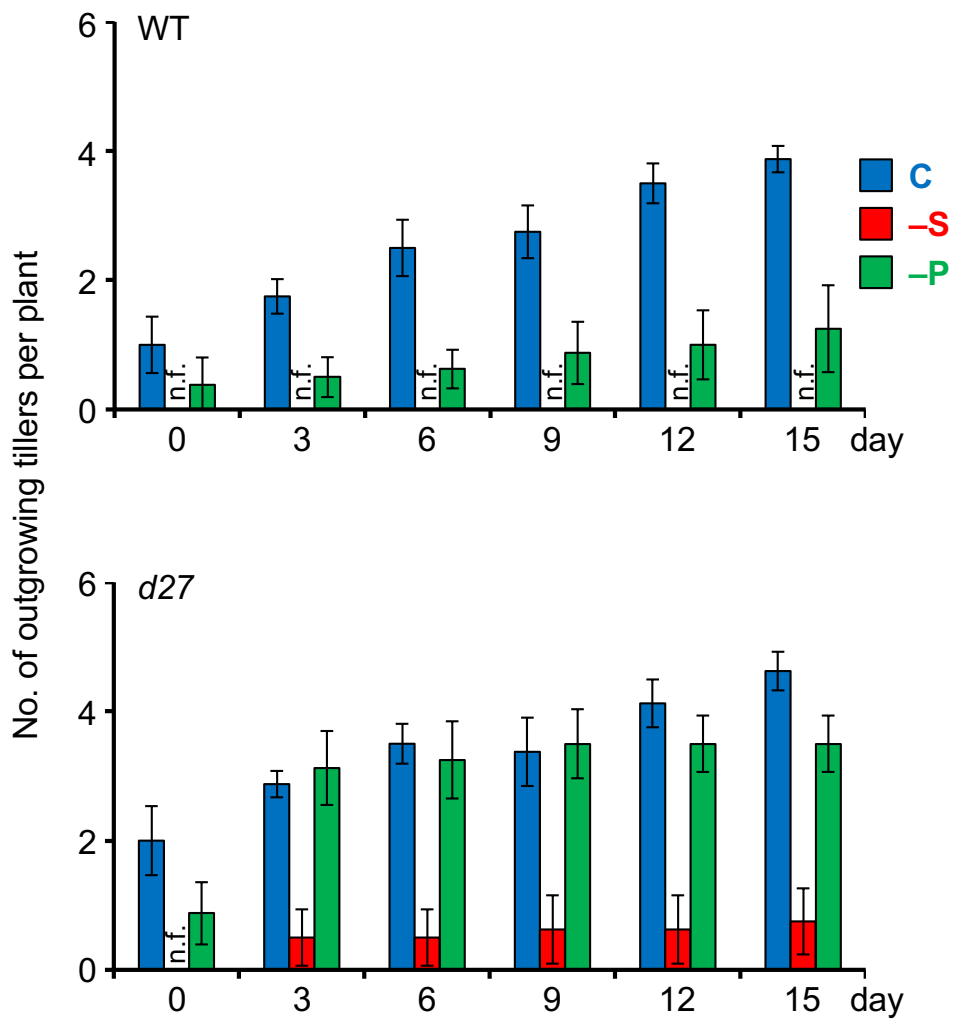

**Figure S8** Effect of P or S deficiency on shoot branching. Outgrowing tillers over 2 mm were counted every 3 days after transfer to hydroponic culture media. C, control; n.f., not found. Data are mean  $\pm$  S.D. ( $n = 8$ ).
