# Supplementary material for: Upregulation of DWARF27 is associated with increased strigolactone levels under sulfur deficiency in rice
Source: PubMed Central journal article supplement (PMC6508544; doi:10.1002/pld3.50), 2018-04-11
Supplement: PLD3-2-e00050-s002.pdf [file PLD3-2-e00050-s002.pdf]

Table S1 Hydroponic culture media used to investigate effects of nutrient deficiency.

| Final concentration | Macro nutrient                   | Medium |    |    |    |    |     |     |     |     |     |     |      |
|---------------------|----------------------------------|--------|----|----|----|----|-----|-----|-----|-----|-----|-----|------|
|                     |                                  | C      | -N | -P | -K | -S | -Ca | -Mg | -Fe | -NP | -NS | -PS | -NPS |
| 1 mM                | NH <sub>4</sub> NO <sub>3</sub>  | +      | -  | +  | +  | +  | +   | +   | +   | -   | -   | +   | -    |
| 0.6 mM              | NaH <sub>2</sub> PO <sub>4</sub> | +      | +  | -  | +  | +  | +   | +   | +   | -   | +   | -   | -    |
| 0.3 mM              | K <sub>2</sub> SO <sub>4</sub>   | +      | +  | +  | -  | -  | +   | +   | +   | +   | -   | -   | -    |
| 0.3 mM              | Na <sub>2</sub> SO <sub>4</sub>  | -      | -  | -  | +  | -  | -   | -   | -   | -   | -   | -   | -    |
| 0.3 mM              | KCl                              | -      | -  | -  | -  | +  | -   | -   | -   | -   | +   | +   | +    |
| 0.2 mM              | CaCl <sub>2</sub>                | +      | +  | +  | +  | +  | -   | +   | +   | +   | +   | +   | +    |
| 0.4 mM              | MgCl <sub>2</sub>                | +      | +  | +  | +  | +  | +   | -   | +   | +   | +   | +   | +    |
| 45 μM               | Fe-EDTA                          | +      | +  | +  | +  | +  | +   | +   | -   | +   | +   | +   | +    |
| +S micronutrients*  |                                  | +      | +  | +  | +  | -  | +   | +   | +   | +   | -   | -   | -    |
| -S micronutrients** |                                  | -      | -  | -  | -  | +  | -   | -   | -   | -   | +   | +   | +    |

\* 50 μM H<sub>3</sub>BO<sub>3</sub>, 9 μM MnSO<sub>4</sub>, 0.3 μM CuSO<sub>4</sub>, 0.7 μM ZnSO<sub>4</sub>, and 0.1 μM NaMoO<sub>4</sub>

\*\* 50 μM H<sub>3</sub>BO<sub>3</sub>, 9 μM MnCl<sub>2</sub>, 0.3 μM CuCl<sub>2</sub>, 0.7 μM ZnCl<sub>2</sub>, and 0.1 μM NaMoO<sub>4</sub>

C, control; + supplied; - absent.

Table S2 Primers and TaqMan probes for qRT-PCR.

| Primer*                 | 5'-Sequence-3'                     |
|-------------------------|------------------------------------|
| <i>D3-F</i>             | CCCAACCTCCGCAAGCT                  |
| <i>D3-R</i>             | GACGCAATCGCTGAACCG                 |
| <i>D3-TaqMan</i>        | f-TGGCGCCATGCTTGTTC AACCC-t**      |
| <i>D10-F</i>            | CTGTACAAGTTCGAGTGGCACC             |
| <i>D10-R</i>            | CCTCGTCCGTCTCCTCGTAC               |
| <i>D10-TaqMan</i>       | f-CAAGGCCAGCGGCAAGATTG-t           |
| <i>D14-F</i>            | GCCTCTCCCCGTTCTTG                  |
| <i>D14-R</i>            | TGCTGTATCTCCTCCAGCTCG              |
| <i>D14-TaqMan</i>       | f-ACGACAGCGACTACCACGGCGG-t         |
| <i>D17-F</i>            | CCTCGTCCAGAAGCGTGAG                |
| <i>D17-R</i>            | TAGTGGGTGTCGGTGAAGGC               |
| <i>D17-TaqMan</i>       | f-TCGTTCGTGCCGGACCACCTCA-t         |
| <i>D27-F</i>            | AGATGACCCTGCATTGAAGCA              |
| <i>D27-R</i>            | GCAATTCACACCATGATTCTGC             |
| <i>D27-TaqMan</i>       | f-CCATGCTTCCGGACAAAATGCG-t         |
| <i>Os5100-F</i>         | CTCTCCACCAGAAGGGCCTC               |
| <i>Os5100-R</i>         | GAGATGATCGTGTTCCCTCATCG            |
| <i>Os5100-TaqMan</i>    | f-TCTTCACAAGGGACGCGAGGTGGT-t       |
| <i>Os900-F</i>          | CGTGAACCTCACGCTCGG                 |
| <i>Os900-R</i>          | TTCATTGCAGCCGTCGG                  |
| <i>Os900-TaqMan</i>     | f-CAGCTTGACAGGATCGTCGCCGA-t        |
| <i>Os1400-F</i>         | TGCATTGAGTGCGTGTCCA                |
| <i>Os1400-R</i>         | GAAGCCGAGAGCGAGATCG                |
| <i>Os1400-TaqMan</i>    | f-ACCTTGATGGCCAAGAGGACATAACATTCT-t |
| <i>Os1500-F</i>         | AAGTGCTCAAGAGGATTCCCG              |
| <i>Os1500-R</i>         | CGATGCTGTCCATATGTGTTTTTC           |
| <i>Os1500-TaqMan</i>    | f-CAAGATCGACCGGGTCAACCGC-t         |
| <i>Os1900-F</i>         | TACGTGGACGCTCTGGTGG                |
| <i>Os1900-R</i>         | TCTTGCCGATGATGTCGATG               |
| <i>Os1900-TaqMan</i>    | f-TCCCCTTCTGCCAGCTCTCGCTGT-t       |
| <i>Ubiquitin-F</i>      | AAGGTCACCAGGCTCAGGAAG              |
| <i>Ubiquitin-R</i>      | GATCGAAGTGGTTGGCCATG               |
| <i>Ubiquitin-TaqMan</i> | f-CAACAACGACTGCGGCGCG-t            |

\*F, forward primers; R, reverse primers.

\*\*Fluorescent labels: f, FAM; t, TAMRA.

**Figure S1** Effect of nutrient deficiency in rice. Wild-type seedlings were grown in hydroponic culture media without the indicated macronutrients for one week. C, control. Outgrowing tillers (>2 mm) were counted in 2-week-old seedlings. **A.** Effect of nutrient deficiency on tiller bud outgrowth. An arrowhead indicates the outgrowth of the second leaf tiller. n.f., not found. Scale bar = 1 cm. **B.** Complementation by 1  $\mu$ M GR24. Data are means  $\pm$  S.E. ( $n = 3$ ). \*  $P < 0.05$  (Student's  $t$ -test).

**Figure S2** The levels of 4DO in root exudates and roots in WT rice seedlings at various S concentrations. Samples were collected on day 7 after transfer to hydroponic media, and 4DO levels were analyzed using LC-MS/MS. Data are means  $\pm$  S.E. ( $n = 4$ ). Different letters indicate significant differences (Tukey's HSD,  $P < 0.05$ ).

**Figure S3** Time-course analysis of 4DO levels and expression of SL-related genes in WT rice seedlings. **A.** Schematic diagram of experimental conditions. Blue and red lines indicate +S and -S conditions, respectively. Seedlings were transferred to fresh +S or -S medium on day 14, and 4DO levels and gene expression were analyzed on days 14, 15, and 16. **B.** 4DO levels in roots. Data are means  $\pm$  S.E. ( $n = 4$ ). **C.** Transcript levels of SL-related genes in roots. Data are means  $\pm$  S.E. ( $n = 3$ ). Different lowercase letters indicate significant differences (Tukey's HSD,  $P < 0.05$ ).

**Figure S4** Transcript levels of the SL-signaling genes *D3* and *D14* in roots under +S and -S conditions. Data are means  $\pm$  S.E. ( $n = 3$ ). The experimental procedure is shown in Fig. 6A. Expression was analyzed on day 15 of culture. \* $P < 0.05$  ( $t$ -test).

**Figure S5** Effect of S deficiency on chlorophyll content. **A.** Schematic diagram of experimental conditions. Black and gray bars indicate +S and -S conditions, respectively. **B.** SPAD values indicating chlorophyll contents in the third leaves. Data are means  $\pm$  S.E. ( $n = 3$ ). \*  $P < 0.01$  (Student  $t$ -test). **C.** Comparison of the SPAD values of WT and the *d27*, *d10*, and *d14* mutants. Data are means  $\pm$  S.E. ( $n = 3$ ). Significant differences between WT and, *d10*, *d14* and *d27* are shown as +, #,  $\times$  respectively (ANOVA,  $P < 0.05$ ).

**Figure S6** Effect of S deficiency on chlorophyll content. **A.** Schematic diagram of experimental conditions. Black and gray bars indicate +S and -S conditions, respectively. **B.** SPAD values indicating chlorophyll contents in the third leaves. Data are means  $\pm$  S.E. ( $n = 3$ ). \*  $P < 0.01$  (Student  $t$ -test). **C.** Comparison of the SPAD values of WT and the *d27*, *d10*, and *d14* mutants. Data are means  $\pm$  S.E. ( $n = 3$ ). Significant differences between WT and, *d10*, *d14* and *d27* are shown as +, #,  $\times$  respectively (ANOVA,  $P < 0.05$ ).

**Figure S7** The levels of 4DO in root exudates and roots of WT and *d27* seedlings. C, control. Samples were collected on day 7 after transfer to hydroponic culture medium (C, -S, or -P) and 4DO levels were analyzed using LC-MS/MS. n.d., not detected. Data are means  $\pm$  S.E. ( $n = 4$ ). Different letters indicate significant differences (Tukey's HSD,  $P < 0.05$ ).

**Figure S8** Effect of P or S deficiency on shoot branching. Outgrowing tillers over 2 mm were counted every 3 days after transfer to hydroponic culture media. C, control; n.f., not found. Data are mean  $\pm$  S.D. ( $n = 8$ ).
